# Supplementary material for: Contact With Mental Health Services Prior to Suicide: A Systematic Review and Meta-Analysis
Source: Atypon-hosted journal article supplement (doi:10.1176/appi.ps.201700475), 2018-04-16
Supplement: appi.ps.201700475.ds001.pdf [file appi.ps.201700475.ds001.pdf]

## Online supplementary material

Figure 1

PRISMA Flow diagram of the systematic search for studies reporting on contact with mental health services before suicide.

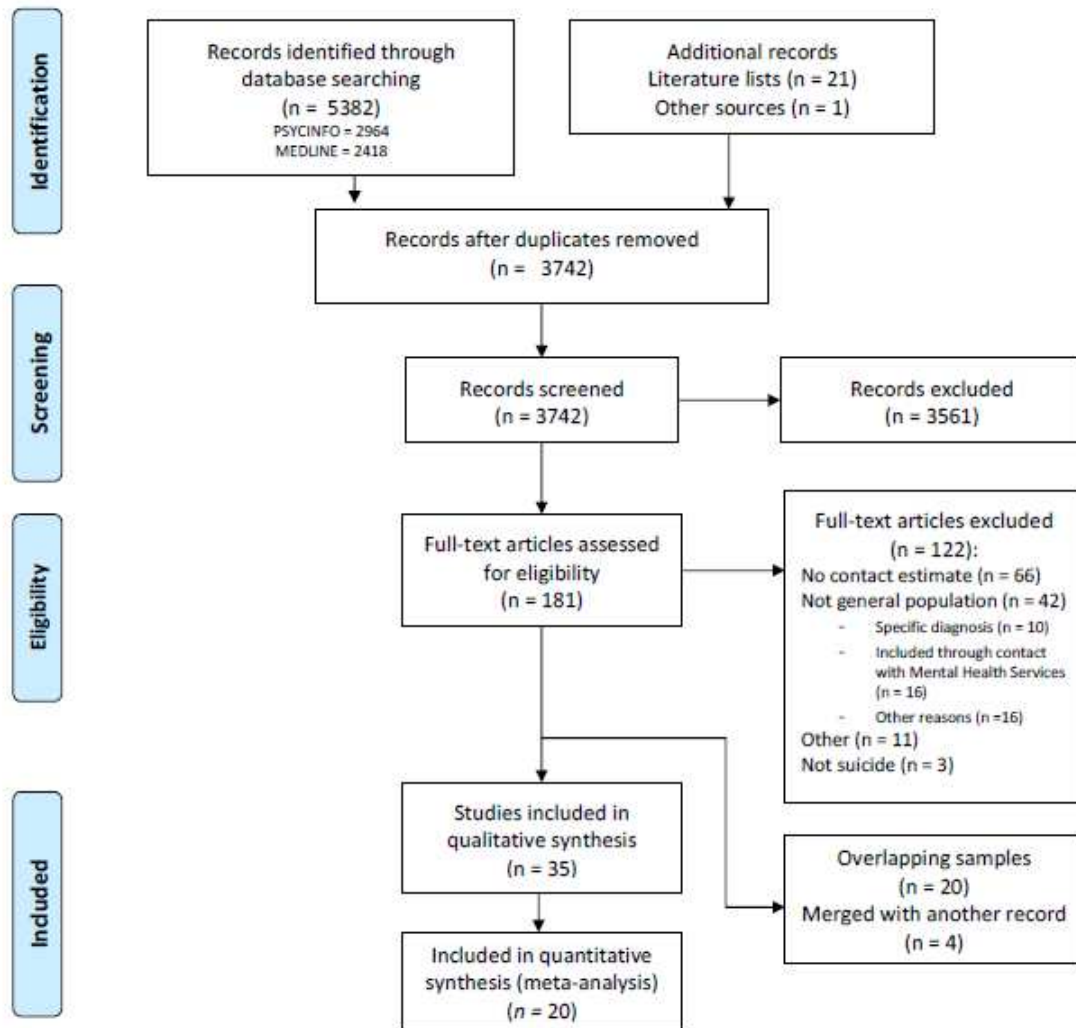

**Table 1****Studies excluded due to overlapping samples**

| <b>Author (year)</b> | <b><i>N</i></b> | <b>Country</b> | <b>Record included in review</b> |
|----------------------|-----------------|----------------|----------------------------------|
| Agerbo (1)           | 9011            | Denmark        | Qin (2-4)                        |
| Andersen (5)         | 472             | Denmark        | Qin (2-4)                        |
| Beautrais (6)        | 61              | Australia      | Beautrais (7)                    |
| Chang (8)            | 862             | Taiwan         | Lee (9)                          |
| Chang (10)           | 12497           | Taiwan         | Lee (9)                          |
| Erlangsen (11)       | 2323            | Denmark        | Qin (2-4)                        |
| Hjorthøj (12)        | 2429            | Denmark        | Qin (2-4)                        |
| Gairin (13)          | 219             | England        | Hunt (14), Meehan (15)           |
| Lahti (16)           | 58              | Finland        | Pirkola (17)                     |
| Linsley (18)         | 205             | England        | Hunt (14), Meehan (15)           |
| Mortensen (19)       | 811             | Denmark        | Qin (2-4)                        |
| Nicoll (20)          | 752             | Scotland       | Dougall (21)                     |
| Ougrin (22)          | 54              | England        | Hunt (23)                        |
| Pan (24)             | 2351            | Taiwan         | Lee (9)                          |
| Phillips (25)        | 519             | China          | Yang (26)                        |
| Renaud (27)          | 55              | Canada         | Gontijo Guerra (28)              |
| Renaud (29)          | 67              | Canada         | Gontijo Guerra (28)              |
| Stark (30)           | 177             | Scotland       | Dougall (21)                     |
| Stenager (31)        | 4142            | Denmark        | Qin (2-4)                        |
| Webb (32)            | 2385            | Denmark        | Qin (2-4)                        |



Table 2 - Characteristics of included studies

| Author (year)             | Country     | Time period | Age group | Design                | Cumulative percentage in contact with services |            |             |             |              |        |               |               |
|---------------------------|-------------|-------------|-----------|-----------------------|------------------------------------------------|------------|-------------|-------------|--------------|--------|---------------|---------------|
|                           |             |             |           |                       | Suicides                                       | Current    | 1 month     | 3 months    | 6 months     | 1 year | Life          |               |
| <b>Inpatient services</b> |             |             |           |                       |                                                |            |             |             |              |        |               |               |
| Ahmedani (33)             | USA         | 2000-10     |           | Record review         | 5894                                           |            | 4%<br>(232) |             |              |        | 14%<br>(836)  |               |
|                           | Male        |             |           |                       | 4534                                           |            | 4%<br>(159) |             |              |        | 12%<br>(541)  |               |
|                           | Female      |             |           |                       | 1359                                           |            | 5%<br>(73)  |             |              |        | 22%<br>(295)  |               |
| Bakken (34)               | Norway      | 2009-11     |           | Register linkage      | 1721                                           | 5%<br>(79) |             |             |              |        | 22%<br>(378)  |               |
| Bakst (35)                | Israel      | 2007-10     |           | Psychological autopsy | 98                                             |            |             |             | 16%<br>(16)  |        |               | 34%<br>(33)   |
| Beautrais (7)             | New Zealand | 1991-95     |           | Psychological autopsy | 202                                            |            |             |             |              |        | 17%<br>(35)   |               |
| Chock (36)                | USA         | 2000-09     |           | Record review         | 86                                             |            |             |             |              |        | 19%<br>(16)   |               |
| Conwell (37)              | USA         |             | 50 +      | Psychological autopsy | 86                                             |            |             |             |              |        |               | 29%<br>(25)   |
| Deisenhammer (38)         | Austria     | 2004-11     |           | Record review         | 711                                            | 4%<br>(30) |             |             | 17%<br>(119) |        |               |               |
|                           | Male        |             |           |                       | 531                                            | 3%<br>(18) |             |             | 14%<br>(73)  |        |               |               |
|                           | Female      |             |           |                       | 180                                            | 7%<br>(12) |             |             | 26%<br>(46)  |        |               |               |
| Deisenhammer (39)         | Austria     | 1996-02     |           | Record review         | 665                                            |            | 8%<br>(52)  |             |              |        | 16%<br>(109)  |               |
| Dougall (21)              | Scotland    | 1981-10     | 15+       | Register linkage      | 16411                                          |            |             | 6%<br>(908) | 8%<br>(1254) |        | 10%<br>(1581) | 14%<br>(2270) |
|                           | Male        |             |           |                       | 12112                                          |            |             |             |              |        | 12%<br>(1458) |               |
|                           | Female      |             |           |                       | 4299                                           |            |             |             |              |        | 19%<br>(812)  |               |
| Farand (40)               | Canada      | 1992-96     | 0-19      | Record review         | 435                                            | 1%<br>(3)  |             |             |              |        |               |               |
| Ho (41)                   | Hong Kong   | 1997-99     |           | Record review         | 2432                                           | 3%<br>(80) |             | 7%<br>(179) |              |        |               | 20%<br>(486)  |
| Hoffmann-Richter (42)     | Switzerland | 1992-94     |           | Record review         | 287                                            | 2%<br>(6)  | 6%<br>(18)  | 8%<br>(24)  |              |        | 11%<br>(32)   |               |
| Houston (43)              | England     | 1993-95     | 15-24     | Psychological autopsy | 47                                             | 6%<br>(3)  |             |             |              |        |               | 13%<br>(6)    |

| Author (year)              | Country       | Time period | Age group | Design                   | Cumulative percentage in contact with services |              |               |                |                |               |               |
|----------------------------|---------------|-------------|-----------|--------------------------|------------------------------------------------|--------------|---------------|----------------|----------------|---------------|---------------|
|                            |               |             |           |                          | Suicides                                       | Current      | 1 month       | 3 months       | 6 months       | 1 year        | Life          |
| Meehan (15) Hunt (23)      | England/Wales | 1996-00     |           | National clinical survey | 20927                                          | 4%<br>(754)  |               | 9%<br>(1854)   |                |               |               |
| King (44)                  | England       | 1988-93     | 15+       | Record review            | 1457                                           | 2%<br>(32)   |               | 7%<br>(96)     |                | 14%<br>(207)  |               |
|                            | Male          |             |           |                          | 1037                                           | 2%<br>(19)   |               |                |                | 22%<br>(231)  |               |
|                            | Female        |             |           |                          | 420                                            | 3%<br>(13)   |               |                |                | 39%<br>(164)  |               |
| Lesage (45)                | Canada        | 2002-03     |           | Psychological autopsy    | 102                                            |              | 4%<br>(4)     |                |                | 28%<br>(29)   | 70 %<br>(71)  |
| Paraschakis (46)           | Greece        | 2007-09     | 60+       | Psychological autopsy    | 118                                            |              |               |                |                | 13%<br>(15)   |               |
| Pirkola (17)               | Finland       | 1985-91     |           | Register linkage         | 9719                                           |              | 9 %<br>(904)  | 13 %<br>(1286) | 17 %<br>(1628) | 20%<br>(1981) |               |
|                            | Male          |             |           |                          | 7666                                           |              |               |                |                | 17%<br>(1293) |               |
|                            | Female        |             |           |                          | 2053                                           |              |               |                |                | 34%<br>(688)  |               |
|                            |               | 1995-01     |           |                          | 8761                                           |              | 9%<br>(784)   | 13%<br>(1173)  | 17%<br>(1517)  | 21%<br>(1865) |               |
|                            | Male          |             |           |                          | 6804                                           |              |               |                |                | 18%<br>(1246) |               |
|                            | Female        |             |           |                          | 1957                                           |              |               |                |                | 32%<br>(619)  |               |
| Qin (2-4)                  | Denmark       | 1981-97     |           | Register linkage         | 21169                                          | 7%<br>(1461) | 13%<br>(2780) |                | 21%<br>(4437)  | 25%<br>(5336) | 44%<br>(9316) |
|                            | Male          |             |           |                          | 13681                                          | 5%<br>(736)  | 10%<br>(1432) |                | 17%<br>(2360)  | 21%<br>(2839) | 37%<br>(5059) |
|                            | Female        |             |           |                          | 7488                                           | 10%<br>(725) | 18%<br>(1348) |                | 28%<br>(2077)  | 33%<br>(2497) | 57%<br>(4257) |
| Reutfors (47)              | Sweden        | 1991-03     | 18+       | Register linkage         | 20675                                          | 4%<br>(769)  | 11%<br>(2187) |                |                | 25%<br>(5202) |               |
|                            | Male          |             |           |                          | 14501                                          | 3%<br>(457)  | 9%<br>(1346)  |                |                | 22%<br>(3261) |               |
|                            | Female        |             |           |                          | 6174                                           | 5%<br>(312)  | 14%<br>(841)  |                |                | 31%<br>(1941) |               |
| Sveticic (48)              | Australia     | 1994-07     |           | Psychological autopsy    | 7126                                           |              |               |                |                |               | 13%<br>(917)  |
| <b>Outpatient services</b> |               |             |           |                          |                                                |              |               |                |                |               |               |
| Chock (36)                 | USA           | 2000-09     |           | Record review            | 86                                             |              |               |                |                | 40%<br>(34)   |               |
| Farand (40)                | Canada        | 1992-96     | 0-19      | Record review            | 435                                            |              |               |                |                | 9%<br>(38)    |               |



| Author (year)         | Country       | Time period | Age group | Design                   | Cumulative percentage (n) in contact with services |             |               |               |            |                |               |
|-----------------------|---------------|-------------|-----------|--------------------------|----------------------------------------------------|-------------|---------------|---------------|------------|----------------|---------------|
|                       |               |             |           |                          | Suicides                                           | Current     | 1 month       | 3 months      | 6 months   | 1 year         | Life          |
| Farand (40)           | Canada        | 1992-96     | 0-19      | Record review            | 435                                                |             |               |               |            | 10%<br>(43)    |               |
| Ho (41)               | Hong Kong     | 1997-99     |           | Record review            | 2432                                               |             | 16%<br>(394)  | 21%<br>(511)  |            |                | 25%<br>(606)  |
| Houston (43)          | England       | 1993-95     | 15-24     | Psychological autopsy    | 47                                                 | 32%<br>(15) |               |               |            |                | 32%<br>(15)   |
| Meehan (15) Hunt (14) | England/Wales | 1996-00     |           | National clinical survey | 20927                                              |             |               |               |            | 24%<br>(5099)  |               |
| Hunt (23)             | England       | 2003-11     | 18+       | National clinical survey | 39361                                              |             |               |               |            | 27%<br>(10744) |               |
| King (44)             | England       | 1988-93     | 15+       | Record review            | 1457                                               |             |               |               |            | 27%<br>(395)   | 41%<br>(602)  |
| Kung (53, 54)         | USA           | 1993-93     | 15-64     | Psychological autopsy    | 1463                                               |             |               |               |            | 16%<br>(238)   |               |
| Lawrence (55)         | Australia     | 1980-95     | 60+       | Record review            | 447                                                |             |               |               |            |                | 40%<br>(181)  |
| Lee (9)               | Taiwan        | 1998-04     | 15+       | Register linkage         | 19426                                              |             | 13%<br>(2511) |               |            | 22%<br>(4322)  |               |
|                       | Male          |             |           |                          | 13151                                              |             | 10%<br>(1358) |               |            | 18%<br>(2411)  |               |
|                       | Female        |             |           |                          | 6275                                               |             | 18%<br>(1153) |               |            | 30%<br>(1911)  |               |
| Loh (56)              | Singapore     | 2000-04     | 10-24     | Record review            | 188                                                |             | 28%<br>(52)   |               |            |                |               |
| Rodway (57)           | England       | 2014-15     | 10-19     | National clinical survey | 130                                                |             |               |               |            | 13%<br>(17)    | 41%<br>(53)   |
| Sveticic (48)         | Australia     | 1994-07     |           | Psychological autopsy    | 7126                                               |             |               | 25%<br>(1764) |            |                | 42%<br>(2991) |
| Weis (58)             | USA           | 2004-04     |           | Register linkage         | 491                                                |             | 6%<br>(29)    | 8%<br>(40)    | 9%<br>(46) |                | 19%<br>(91)   |
| Windfuhr (59)         | UK            | 1997-03     | 10-19     | National clinical survey | 1722                                               |             | 9%<br>(156)   |               |            | 14%<br>(242)   |               |
| Yang (26)             | China         | 1995-00     |           | Psychological autopsy    | 895                                                |             |               |               |            |                | 8%<br>(76)    |





**Table 3****Risk of Bias assessment**

| <b>Study</b>            | <b>External validity</b>       |                               |                                 | <b>Internal validity</b>         |                               |                                   |                    | <b>Overall assessment</b> |
|-------------------------|--------------------------------|-------------------------------|---------------------------------|----------------------------------|-------------------------------|-----------------------------------|--------------------|---------------------------|
|                         | Representative national sample | Representative sampling frame | Random selection / census taken | Data collection reliable / valid | Acceptable suicide definition | Appropriate numerator/denominator | Suitable subgroups |                           |
| Ahmedani (33)*          | Low                            | Low                           | High                            | High                             | Low                           | High                              | Low                | Moderate                  |
| Bakken (34)*            | Low                            | Low                           | Low                             | Low                              | Low                           | Low                               | Low                | Low                       |
| Bakst (35)              | High                           | High                          | High                            | High                             | High                          | High                              | Low                | High                      |
| Beautrais (7)*          | High                           | Low                           | High                            | High                             | High                          | Low                               | Low                | Moderate                  |
| Bressani (50)           | High                           | Low                           | High                            | High                             | High                          | High                              | Low                | High                      |
| Chiu (51)               | High                           | High                          | High                            | Low                              | High                          | Low                               | Low                | High                      |
| Chock (36)*             | High                           | Low                           | Low                             | High                             | High                          | Low                               | Low                | Moderate                  |
| Coffey (52)             | High                           | Low                           | Low                             | High                             | Low                           | Low                               | Low                | Moderate                  |
| Conwell (37)            | High                           | High                          | High                            | Low                              | High                          | Low                               | High               | High                      |
| Deisenhammer (38)*      | High                           | Low                           | High                            | Low                              | High                          | High                              | Low                | Moderate                  |
| Deisenhammer (39)*      | High                           | Low                           | High                            | Low                              | High                          | Low                               | Low                | Moderate                  |
| Dougall (21)*           | Low                            | Low                           | Low                             | Low                              | High                          | Low                               | Low                | Low                       |
| Farand (40)             | High                           | Low                           | Low                             | High                             | Low                           | Low                               | Low                | Moderate                  |
| Gontijo Guerra (28)     | High                           | Low                           | Low                             | Low                              | Low                           | Low                               | Low                | Moderate                  |
| Ho (41)*                | Low                            | Low                           | Low                             | Low                              | Low                           | High                              | Low                | Low                       |
| Hoffmann-Richter (42)*  | High                           | Low                           | High                            | High                             | High                          | Low                               | Low                | High                      |
| Houston (43)            | High                           | High                          | High                            | Low                              | High                          | Low                               | Low                | Moderate                  |
| Hunt (60), Meehan (61)* | Low                            | Low                           | Low                             | Low                              | High                          | Low                               | Low                | Low                       |
| Hunt (23)*              | Low                            | Low                           | Low                             | Low                              | Low                           | Low                               | Low                | Low                       |
| King (44)*              | High                           | Low                           | Low                             | Low                              | Low                           | Low                               | Low                | Low                       |
| Kung (53, 54)*          | Low                            | High                          | Low                             | High                             | Low                           | High                              | Low                | Moderate                  |
| Lawrence (55)           | High                           | Low                           | Low                             | High                             | High                          | Low                               | Low                | Moderate                  |
| Lee (9)*                | Low                            | Low                           | Low                             | Low                              | Low                           | Low                               | Low                | Low                       |
| Lesage (45)*            | High                           | Low                           | High                            | Low                              | High                          | High                              | Low                | High                      |

|                  |      |      |      |      |      |      |      |     |          |
|------------------|------|------|------|------|------|------|------|-----|----------|
| Loh (56)         | High | Low  | High | High | High | High | High | Low | High     |
| Paraschakis (46) | High | Low  | High | High | High | High | High | Low | High     |
| Pirkola (17)*    | Low  | Low | Low      |
| Qin (2-4)*       | Low  | Low | Low      |
| Reutfors (47)*   | Low  | Low | Low      |
| Rodway (57)      | High | Low  | High | Low  | Low  | High | High | Low | Moderate |
| Schaffer (49)*   | High | Low  | Low  | Low  | Low  | High | Low  | Low | Low      |
| Svetitic (48)    | High | Low  | Low  | Low  | Low  | High | Low  | Low | Moderate |
| Weis (58)        | High | Low  | High | Low  | Low  | Low  | Low  | Low | Moderate |
| Windfuhr (59)    | High | Low  | Low  | Low  | Low  | Low  | Low  | Low | Low      |
| Yang (26)        | Low  | High | High | Low  | Low  | High | High | Low | High     |

---

*Note.* Studies marked with \* is included in the meta-analysis.



## References

1. Agerbo E. Effect of psychiatric illness and labour market status on suicide: a healthy worker effect? *J Epidemiol Community Health*. 2005;59(7):598-602.
2. Qin P, Nordentoft M, Hoyer EH, Agerbo E, Laursen TM, Mortensen PB. Trends in suicide risk associated with hospitalized psychiatric illness: a case-control study based on Danish longitudinal registers. *J Clin Psychiatry*. 2006;67(12):1936-41.
3. Qin P, Nordentoft M. Suicide risk in relation to psychiatric hospitalization: evidence based on longitudinal registers. *Arch Gen Psychiatry*. 2005;62(4):427-32.
4. Qin P, Agerbo E, Mortensen PB. Suicide risk in relation to socioeconomic, demographic, psychiatric, and familial factors: a national register-based study of all suicides in Denmark, 1981-1997. *Am J Psychiatry*. 2003;160(4):765-72.
5. Andersen UA, Andersen M, Rosholm JU, Gram LF. Contacts to the health care system prior to suicide: a comprehensive analysis using registers for general and psychiatric hospital admissions, contacts to general practitioners and practising specialists and drug prescriptions. *Acta Psychiatr Scand*. 2000;102(2):126-34.
6. Beautrais AL. Child and young adolescent suicide in New Zealand. *Aust N Z J Psychiatry*. 2001;35(5):647-53.
7. Beautrais AL. Suicides and serious suicide attempts: two populations or one? *Psychol Med*. 2001;31(5):837-45.
8. Chang HJ, Lai YL, Chang CM, Kao CC, Shyu ML, Lee MB. Gender and age differences among youth, in utilization of mental health services in the year preceding suicide in Taiwan. *Community Ment Health J*. 2012;48(6):771-80.
9. Lee HC, Lin HC, Liu TC, Lin SY. Contact of mental and nonmental health care providers prior to suicide in Taiwan: a population-based study. *Canadian Journal of Psychiatry - Revue Canadienne de Psychiatrie*. 2008;53(6):377-83.
10. Chang C-M, Liao S-C, Chiang H-C, Chen Y-Y, Tseng K-C, Chau Y-L, et al. Gender differences in healthcare service utilisation 1 year before suicide: national record linkage study. *The British Journal of Psychiatry*. 2009;195(5):459-60.
11. Erlangsen A, Mortensen PB, Vach W, Jeune B. Psychiatric hospitalisation and suicide among the very old in Denmark: population-based register study. *Br J Psychiatry*. 2005;187:43-8.
12. Hjorthoj CR, Madsen T, Agerbo E, Nordentoft M. Risk of suicide according to level of psychiatric treatment: a nationwide nested case-control study. *Soc Psychiatry Psychiatr Epidemiol*. 2014;49(9):1357-65.
13. Gairin I, House A, Owens D. Attendance at the accident and emergency department in the year before suicide: retrospective study. *Br J Psychiatry*. 2003;183:28-33.
14. Hunt IM, Kapur N, Robinson J, Shaw J, Flynn S, Bailey H, et al. Suicide within 12 months of mental health service contact in different age and diagnostic groups: National clinical survey. *Br J Psychiatry*. 2006;188:135-42.
15. Meehan J, Kapur N, Hunt IM, Turnbull P, Robinson J, Bickley H, et al. Suicide in mental health in-patients and within 3 months of discharge. National clinical survey. *Br J Psychiatry*. 2006;188:129-34.
16. Lahti A, Harju A, Hakko H, Riala K, Rasanen P. Suicide in children and young adolescents: a 25-year database on suicides from Northern Finland. *J Psychiatr Res*. 2014;58:123-8.
17. Pirkola S, Sohlman B, Heilä H, Wahlbeck K. Reductions in postdischarge suicide after deinstitutionalization and decentralization: a nationwide register study in Finland. *Psychiatr Serv*. 2007;58(2):221-6.
18. Linsley KR, Johnson N, Martin J. Police contact within 3 months of suicide and associated health service contact. *Br J Psychiatry*. 2007;190:170-1.
19. Mortensen PB, Agerbo E, Erikson T, Qin P, Westergaard-Nielsen N. Psychiatric illness and risk factors for suicide in Denmark. *Lancet*. 2000;355(9197):9-12.
20. Nicoll KS, McGee MA, Callender JS. Death by suicide in Grampian 1991-1999: comparison with a previous study. *Scott Med J*. 2004;49(2):44-7.
21. Dougall N, Lambert P, Maxwell M, Dawson A, Sinnott R, McCafferty S, et al. Deaths by suicide and their relationship with general and psychiatric hospital discharge: 30-year record linkage study. *Br J Psychiatry*. 2014;204:267-73.
22. Ougrin D, Banarsee R, Dunn-Toroosian V, Majeed A. Suicide survey in a London borough: primary care and public health perspectives. *Journal of Public Health*. 2011;33(3):385-91.
23. Hunt IM, Rahman MS, While D, Windfuhr K, Shaw J, Appleby L, et al. Safety of patients under the care of crisis resolution home treatment services in England: a retrospective analysis of suicide trends from 2003 to 2011. *The Lancet Psychiatry*. 2014;1(2):135-41.
24. Pan YJ, Lee MB, Chiang HC, Liao SC. The recognition of diagnosable psychiatric disorders in suicide cases' last medical contacts. *Gen Hosp Psychiatry*. 2009;31(2):181-4.

25. Phillips MR, Yang G, Zhang Y, Wang L, Ji H, Zhou M. Risk factors for suicide in China: a national case-control psychological autopsy study. *The Lancet*. 2002;360(9347):1728-36.
26. Yang GH, Phillips MR, Zhou MG, Wang LJ, Zhang YP, Xu D. Understanding the unique characteristics of suicide in China: national psychological autopsy study. *Biomed Environ Sci*. 2005;18(6):379-89.
27. Renaud J, Berlim MT, Seguin M, McGirr A, Tousignant M, Turecki G. Recent and lifetime utilization of health care services by children and adolescent suicide victims: a case-control study. *J Affect Disord*. 2009;117(3):168-73.
28. Gontijo Guerra S, Vasiliadis H-M. Gender differences in youth suicide and healthcare service use. *Crisis: The Journal of Crisis Intervention and Suicide Prevention*. 2016;37(4):290-8.
29. Renaud J, Seguin M, Lesage AD, Marquette C, Choo B, Turecki G. Service use and unmet needs in youth suicide: a study of trajectories. *Canadian Journal of Psychiatry - Revue Canadienne de Psychiatrie*. 2014;59(10):523-30.
30. Stark CR, Vaughan S, Huc S, O'Neill N. Service contacts prior to death in people dying by suicide in the Scottish Highlands. *Rural & Remote Health*. 2012;12:1876.
31. Stenager K, Qin P. Individual and parental psychiatric history and risk for suicide among adolescents and young adults in Denmark: a population-based study. *Soc Psychiatry Psychiatr Epidemiol*. 2008;43(11):920-6.
32. Webb RT, Qin P, Stevens H, Appleby L, Shaw J, Mortensen PB. Combined influence of serious mental illness and criminal offending on suicide risk in younger adults. *Soc Psychiatry Psychiatr Epidemiol*. 2013;48(1):49-57.
33. Ahmedani BK, Simon GE, Stewart C, Beck A, Waitzfelder BE, Rossom R, et al. Health care contacts in the year before suicide death. *J Gen Intern Med*. 2014;29(6):870-7.
34. Bakken IJ, Ellingsen CL, Pedersen AG, Leistad L, Kinge JM, Ebbing M, et al. Comparison of data from the Cause of Death Registry and the Norwegian Patient Register. *Tidsskr Nor Laegeforen*. 2015;135(21):1949-53.
35. Bakst S, Braun T, Hirshberg R, Zucker I, Shohat T. Characteristics of suicide completers with a psychiatric diagnosis before death: a postmortem study of 98 cases. *Psychiatry Res*. 2014;220(1-2):556-63.
36. Chock MM, Bommersbach TJ, Geske JL, Bostwick JM. Patterns of Health Care Usage in the Year Before Suicide: A Population-Based Case-Control Study. *Mayo Clin Proc*. 2015;90(11):1475-81.
37. Conwell Y, Duberstein PR, Hirsch JK, Conner KR, Eberly S, Caine ED. Health status and suicide in the second half of life. *Int J Geriatr Psychiatry*. 2010;25(4):371-9.
38. Deisenhammer EA, Behrnt E-M, Kemmler G, Haring C, Miller C. A comparison of suicides in psychiatric in-patients, after discharge and in not recently hospitalized individuals. *Compr Psychiatry*. 2016;69:100-5.
39. Deisenhammer EA, Huber M, Kemmler G, Weiss EM, Hinterhuber H. Psychiatric hospitalizations during the last 12 months before suicide. *Gen Hosp Psychiatry*. 2007;29(1):63-5.
40. Farand L, Renaud J, Chagnon F. Adolescent suicide in Quebec and prior utilization of medical services. *Can J Public Health*. 2004;95(5):357-60.
41. Ho T-P. Psychiatric care of suicides in Hong Kong. *J Affect Disord*. 2003;76(1-3):137-42.
42. Hoffmann-Richter U, Känzig S, Frei A, Finzen A. Suicide after discharge from psychiatric hospital. *Psychiatr Prax*. 2002;29(1):22-4.
43. Houston K, Hawton K, Shepperd R. Suicide in young people aged 15-24: a psychological autopsy study. *J Affect Disord*. 2001;63(1):159-70.
44. King EA. The Wessex Suicide Audit 1988-1993: A study of 1457 suicides with and without a recent psychiatric contact. *Int J Psychiatry Clin Pract*. 2001;5(2):111-8.
45. Lesage A, Seguin M, Guy A, Daigle F, Bayle MN, Chawky N, et al. Systematic services audit of consecutive suicides in New Brunswick: the case for coordinating specialist mental health and addiction services. *Canadian Journal of Psychiatry - Revue Canadienne de Psychiatrie*. 2008;53(10):671-8.
46. Paraschakis A, Douzenis A, Michopoulos I, Christodoulou C, Vassilopoulou K, Koutsaftis F, et al. Late onset suicide: distinction between "young-old" vs. "old-old" suicide victims. How different populations are they? *Arch Gerontol Geriatr*. 2012;54(1):136-9.
47. Reutfors J, Brandt L, Ekblom A, Isacson G, Sparen P, Osby U. Suicide and hospitalization for mental disorders in Sweden: a population-based case-control study. *J Psychiatr Res*. 2010;44(12):741-7.
48. Svetic J, Milner A, De Leo D. Contacts with mental health services before suicide: a comparison of Indigenous with non-Indigenous Australians. *Gen Hosp Psychiatry*. 2012;34(2):185-91.
49. Schaffer A, Sinyor M, Kurdyak P, Vigod S, Sareen J, Reis C, et al. Population-based analysis of health care contacts among suicide decedents: identifying opportunities for more targeted suicide prevention strategies. *World Psychiatry*. 2016;15(2):135-45.
50. Bressani R, Cioffi I, Fraticelli C, Grillo F, Pisani S, Verri AM, et al. [Suicidal behavior in the North Varese province: a epidemiological analysis]. *Epidemiol Psichiatri Soc*. 2001;10(3):180-5.

51. Chiu H, Yip P, Chi I, Chan S, Tsoh J, Kwan C, et al. Elderly suicide in Hong Kong—a case-controlled psychological autopsy study. *Acta Psychiatr Scand*. 2004;109(4):299-305.
52. Coffey MJ, Coffey CE, Ahmedani BK. Suicide in a health maintenance organization population. *JAMA Psychiatry*. 2015;72(3):294-6.
53. Kung HC, Pearson JL, Wei R. Substance use, firearm availability, depressive symptoms, and mental health service utilization among white and African American suicide decedents aged 15 to 64 years. *Ann Epidemiol*. 2005;15(8):614-21.
54. Kung HC, Pearson JL, Liu X. Risk factors for male and female suicide decedents ages 15-64 in the United States. Results from the 1993 National Mortality Followback Survey. *Soc Psychiatry Psychiatr Epidemiol*. 2003;38(8):419-26.
55. Lawrence D, Almeida OP, Hulse GK, Jablensky AV, Holman CD. Suicide and attempted suicide among older adults in Western Australia. *Psychol Med*. 2000;30(4):813-21.
56. Loh C, Tai BC, Ng WY, Chia A, Chia BH. Suicide in young Singaporeans aged 10-24 years between 2000 to 2004. *Archives of Suicide Research*. 2012;16(2):174-82.
57. Rodway C, Tham S-G, Ibrahim S, Turnbull P, Windfuhr K, Shaw J, et al. Suicide in children and young people in England: A consecutive case series. *The Lancet Psychiatry*. 2016;3(8):751-9.
58. Weis MA, Bradberry C, Carter LP, Ferguson J, Kozareva D. An exploration of human services system contacts prior to suicide in South Carolina: an expansion of the South Carolina Violent Death Reporting System. *Inj Prev*. 2006;12 Suppl 2:ii17-ii21.
59. Windfuhr K, While D, Hunt I, Turnbull P, Lowe R, Burns J, et al. Suicide in juveniles and adolescents in the United Kingdom. *J Child Psychol Psychiatry*. 2008;49(11):1155-65.
60. Hunt IM, Kapur N, Robinson J, Shaw J, Flynn S, Bailey H, et al. Suicide within 12 months of mental health service contact in different age and diagnostic groups. National clinical survey. 2006;188(2):135-42.
61. Meehan J, Kapur N, Hunt IM, Turnbull P, Robinson J, Bickley H, et al. Suicide in mental health in-patients and within 3 months of discharge. National clinical survey. 2006;188(2):129-34.
